# Supplementary material for: Molecular Dissection of Xyloglucan Recognition in a Prominent Human Gut Symbiont
Source: PubMed Central journal article supplement — mBio. 2016 Apr 26;7(2):e02134-15. doi: 10.1128/mBio.02134-15 (PMC4850273; doi:10.1128/mbio.02134-15), 2016-04-26
Supplement: mbo002162794sf1.pdf [file mbo002162794sf1.pdf]

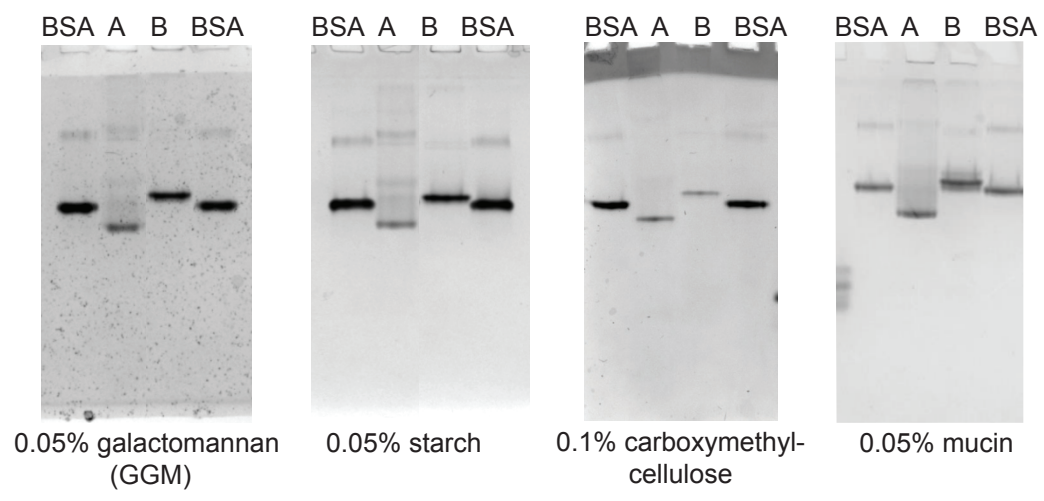

**Figure S1: Affinity PAGE with glycans that are not recognized by SGBP-A and SGBP-B.**  
 Affinity electrophoresis (10% acrylamide) of SGBP-A and SGBP-B with BSA as a control protein. The percent polysaccharide incorporated into each native gel is displayed.
