# Supplementary material for: Molecular Dissection of Xyloglucan Recognition in a Prominent Human Gut Symbiont
Source: PubMed Central journal article supplement — mBio. 2016 Apr 26;7(2):e02134-15. doi: 10.1128/mBio.02134-15 (PMC4850273; doi:10.1128/mbio.02134-15), 2016-04-26
Supplement: mbo002162794sf4.pdf [file mbo002162794sf4.pdf]

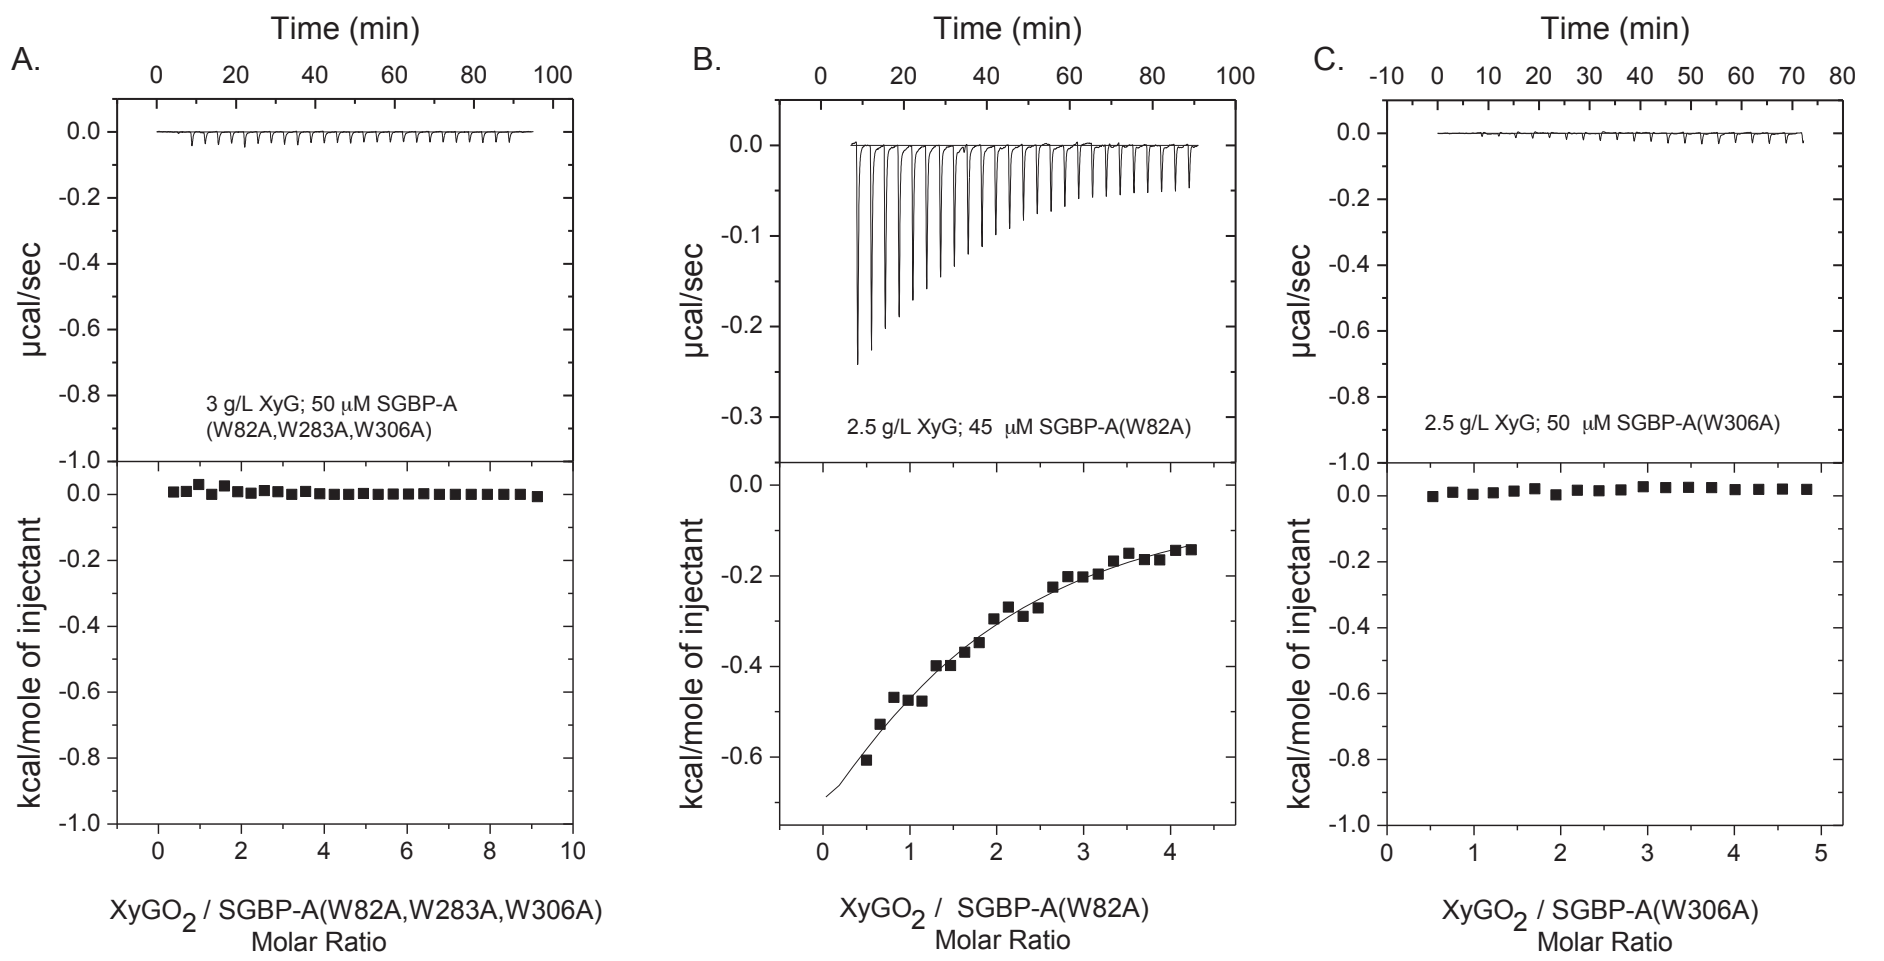

**Figure S4: Representative isothermal titration calorimetry (ITC) results for the SGBP-A site-directed mutants with XyG.** All titrations were performed in 20 mM Hepes, 100 mM NaCl pH 7.0 and at 25 °C. In each case, the upper graph shows the raw heat signal for the 2  $\mu$ L injections of carbohydrate into protein; the bottom graph shows the integrated heats and, where appropriate, fits to a 1:1 binding model. Concentrations of the protein and glycan are indicated in figure. (A) SGBP-A(W82A, W283A, W306A), (B) SGBP-A(W82A), and (C) SGBP-A(W306A).
