# Supplementary material for: Molecular Dissection of Xyloglucan Recognition in a Prominent Human Gut Symbiont
Source: PubMed Central journal article supplement — mBio. 2016 Apr 26;7(2):e02134-15. doi: 10.1128/mBio.02134-15 (PMC4850273; doi:10.1128/mbio.02134-15), 2016-04-26
Supplement: mbo002162794sf5.pdf [file mbo002162794sf5.pdf]

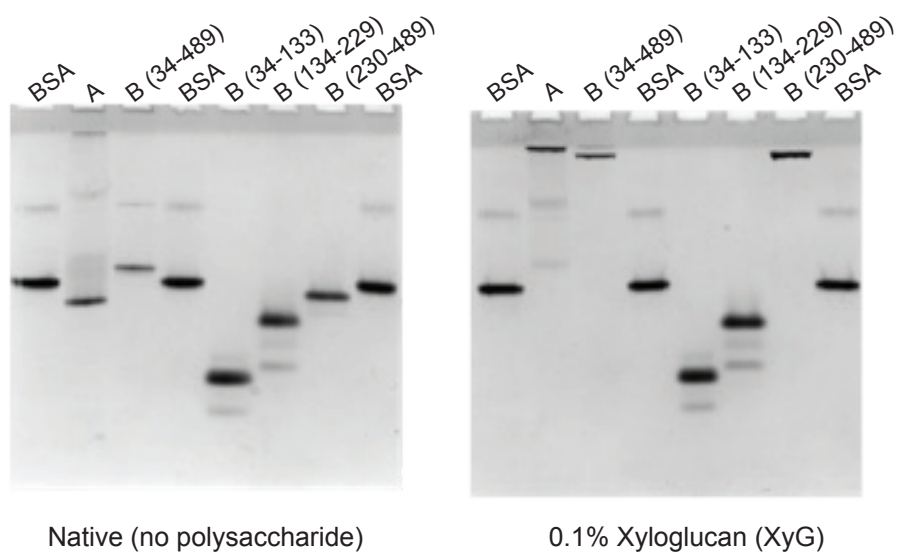

**Figure S5: Affinity PAGE with glycans that are not recognized by SGBP-A and SGBP-B.** Affinity electrophoresis (10% acrylamide, native and 0.1% XyG) of SGBP-A and SGBP-B full length (34-489) and truncated proteins expressing domain A (34-133), domain B (134-229), or domains CD (230-489). BSA was included as a control protein.
