# Supplementary material for: Molecular Dissection of Xyloglucan Recognition in a Prominent Human Gut Symbiont
Source: PubMed Central journal article supplement — mBio. 2016 Apr 26;7(2):e02134-15. doi: 10.1128/mBio.02134-15 (PMC4850273; doi:10.1128/mbio.02134-15), 2016-04-26
Supplement: mbo002162794sf7.pdf [file mbo002162794sf7.pdf]

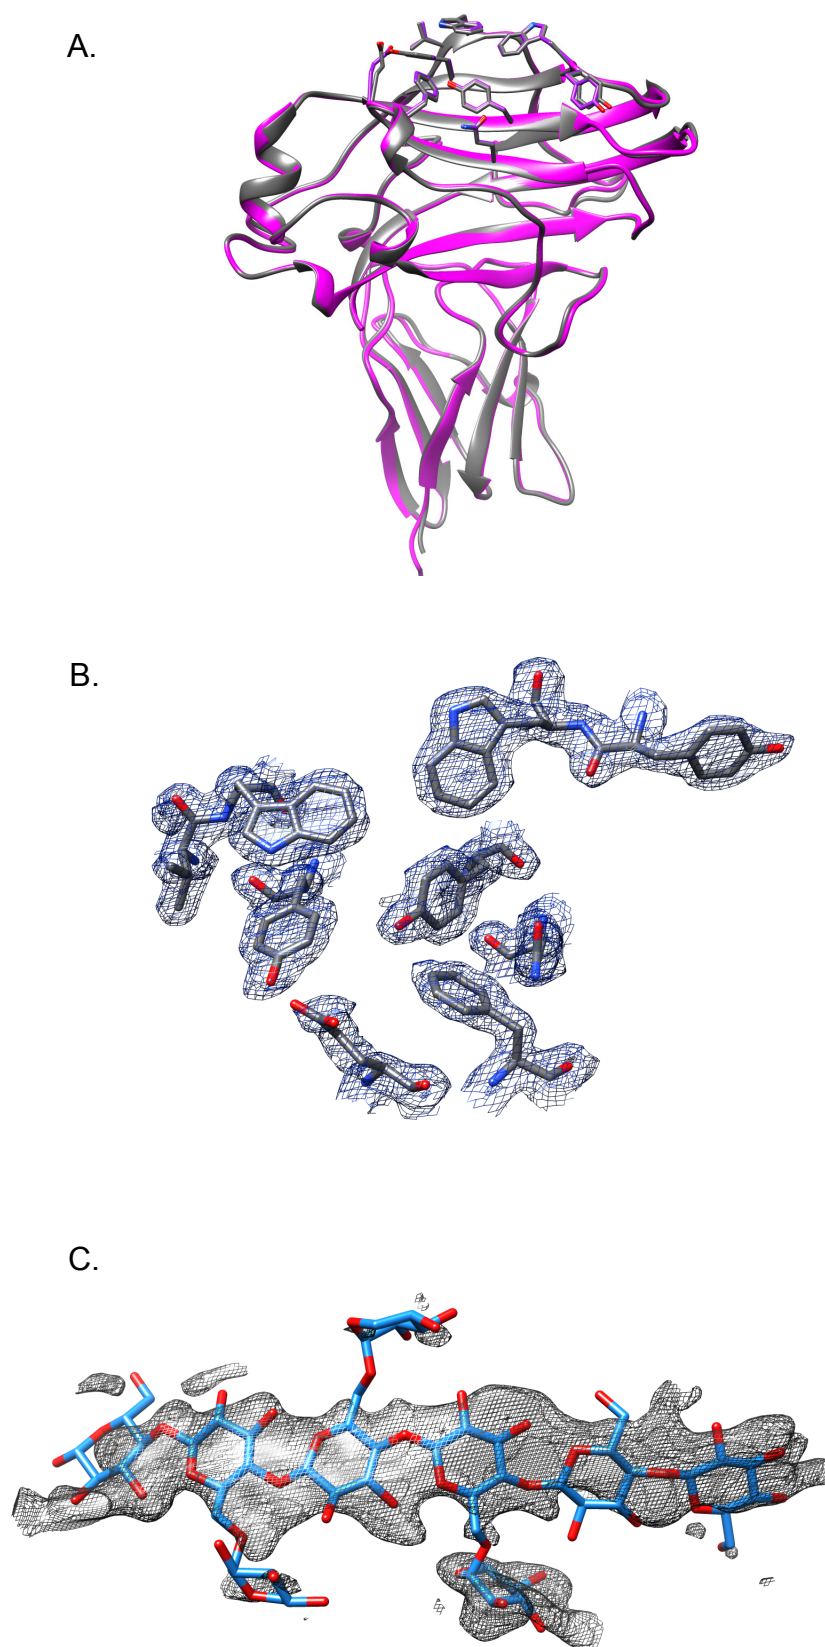

**Figure S7: Structure of domains CD of SGBP-B.** (A) Overlay of the full length SGBP-B (pink) with the 1.57Å structure of the CD domain (grey). Residues involved in binding XyG are shown as sticks. (B) Representative (2Fo-Fc) electron density for the glycan-binding residues from the CD domains structure to demonstrate the overall quality of the electron density map. (C). An omit map (2 $\sigma$ ) of the electron density observed for the XyGO2 ligand; however, the ligand was not included in the final model as an unambiguous fit between the density and the ligand could not be achieved. Shown is the XyGO2 from the full-length structure, for reference.
