# Supplementary material for: Molecular Dissection of Xyloglucan Recognition in a Prominent Human Gut Symbiont
Source: PubMed Central journal article supplement — mBio. 2016 Apr 26;7(2):e02134-15. doi: 10.1128/mBio.02134-15 (PMC4850273; doi:10.1128/mbio.02134-15), 2016-04-26
Supplement: mbo002162794st1.pdf [file mbo002162794st1.pdf]

**Table S1: List of primers used.** Restriction sites are underlined. Mutated codons are in bold.

| Primer name                        | Primer sequence (5' → 3')                                                     | Purpose                                                                    |
|------------------------------------|-------------------------------------------------------------------------------|----------------------------------------------------------------------------|
| BACOVA_02651_pET28_fw              | AAAAACATATGGATAGAGCACCGGAAGGAAAC                                              | SGBP-A (28-546) expression                                                 |
| BACOVA_02651_pET28_rev             | AAAAACTCGAGTTATTCGTTAAATGTATAAGGAACC                                          |                                                                            |
| BACOVA_02651_pEтите_fw             | CATCATCACCACCATCACGAGAACCTGTA <del>CTTC</del><br>CAGGGCGTAGAC GCTACATTTTATACT | SGBP-A (36-546) expression                                                 |
| BACOVA_02651_pEтите_rev            | GTGGCGGCCGCTCTATTATTC<br>GTTAAATGTATAAGG                                      |                                                                            |
| BACOVA_02650_fw                    | AAAAACATATGGATGCTATACCGGTAATTCATT<br>ATATAAGAG                                | SGBP-B (34-489);<br>SGBP-B: domain A (for);<br>domains CD (rev) expression |
| BACOVA_02650_rev                   | AAAAACTCGAGTTATTTCTCACGATGCGG                                                 |                                                                            |
| BACOVA_02650_S133rev               | AAAAACTCGAGTTACGAAAGCACGTGCATATTG<br>TAAGC                                    | SGBP-B domain A expression                                                 |
| BACOVA_02650_P134for               | AAAAACATATGCCTGCACCTTACATCACCCGTA<br>TTTCC                                    | SGBP-B domain B expression                                                 |
| BACOVA_02650_G229rev               | AAAAACTCGAGTTAACCATTCTTCTTAAACTCTG<br>TAACC                                   |                                                                            |
| BACOVA_02650_P230for               | AAAAACATATGCCAAAACCGTTGTTACTGCTG<br>TC                                        | SGBP-B domains CD expression                                               |
| BACOVA_02650_Y363Afor <sup>1</sup> | GGAACAGTGAGTGCATCCAAT <b>GCG</b> TGGTGGAA<br>ACAAAGTTATTCC                    | SGBP-B Y363A mutagenesis                                                   |
| BACOVA_02650_Y363Arev <sup>1</sup> | GGAATAACTTTGTTTCCACC <b>CGC</b> ATTGGATGC<br>ACTCACTGT                        |                                                                            |
| BACOVA_02650_W364Afor <sup>1</sup> | ACAGTGAGTGCATCCAATTAT <b>GCA</b> TGGAAACAA<br>AGTTATTCCAAC                    | SGBP-B W364A mutagenesis                                                   |
| BACOVA_02650_W364Arev <sup>1</sup> | GTTGGAATAACTTTGTTTCCAT <b>GC</b> AATAATTGGA<br>TGCACTCACTGT                   |                                                                            |
| BACOVA_02650_F414Afor <sup>1</sup> | CAAATCGCAATGTGTGAAAAC <b>GCG</b> GATGCTGC<br>ATTAAATGGGTAT                    | SGBP-B F414A mutagenesis                                                   |
| BACOVA_02650_F414Arev <sup>1</sup> | ATACCCATTTAATGCAGCATC <b>CGC</b> GTTTTTCA<br>CATTGCGATTTG                     |                                                                            |
| BACOVA_02651_W82Afor <sup>2</sup>  | GATATGTACAGTCCC <b>GCA</b> AATTATCCGCAGTTT<br>G                               | SGBP-A W82A mutagenesis                                                    |
| BACOVA_02651_W283Afor <sup>2</sup> | GTGCCGTTGGGGGAG <b>GC</b> ATATGAATGTAATAC<br>C                                | SGBP-A W283A mutagenesis                                                   |
| BACOVA_02651_W306Afor <sup>2</sup> | CGGGTGGTGTCAATTGT <b>GCA</b> AGTAGCTATAAT<br>GGAAG                            | SGBP-A W306A mutagenesis                                                   |
| BACOVA_02651_1000 up               | GGTGTATTTCCTCACCGTGGG                                                         | For allelic exchange                                                       |

|                              |                                                 |                                                                                                                               |
|------------------------------|-------------------------------------------------|-------------------------------------------------------------------------------------------------------------------------------|
| BACOVA_02651 1000 down       | CCAAACATGACTACCGATTCC                           | (deletion and complementation) of Bacova_02651 (SGBP-A) using pExchange for <i>B. ovatus</i> mutagenesis                      |
| BACOVA_02651 Not I 750 up    | CCGGCGGCCGCCATGTTTACGAAGGAGGATGAC               |                                                                                                                               |
| BACOVA_02651 BamHI 750 down  | CCGGGATCCCCTACGACTGGCATTGTGGAAC                 |                                                                                                                               |
| BACOVA_02651 middle rev      | CATAAATTCTTCTGATTTATTCGTT                       |                                                                                                                               |
| BACOVA_02651 middle for      | AACGAATAAATCAGAAGAATTTATG                       |                                                                                                                               |
| BACOVA_02650 1000 up         | GGGATATTGGCAAAGGTTTATC                          | For allelic exchange (deletion and complementation) of Bacova_02650 (SGBP-B) using pExchange for <i>B. ovatus</i> mutagenesis |
| BACOVA_02650 1000 down       | GCATAAGCCTTCTCCGCTGCC                           |                                                                                                                               |
| BACOVA_02650 Not I 750 up    | CCGGCGGCCGCCTCGACCGAGGTGACGGGTGG                |                                                                                                                               |
| BACOVA_02650 BamHI 750 down  | CCGGGATCCGTTAAATTGCATTTTCGTCCAG                 |                                                                                                                               |
| BACOVA_02650 middle rev      | CTATTTCAATCAAATCATTATTTTCT                      |                                                                                                                               |
| BACOVA_02650 middle for      | AGAAAATAATGATTTGAATGAAATAG                      | For deletion of Bacova_02649 (GH9) in $\Delta$ SGBP-B <i>B. ovatus</i> .                                                      |
| BACOVA_02649 750up Not for   | CCGGCGGCCGCTTCTATCGTCTTTCCTCCCG                 |                                                                                                                               |
| BACOVA_02649 750up rev       | CTCCTACTTTTTTAGTAAGTGTTCGGTAGGCTCTTTTTCTGGC     |                                                                                                                               |
| BACOVA_02649 750down for     | GCCAAGAAAAGAGCCTACGGAACAGTTACTA<br>AAAAAGTAGGAG |                                                                                                                               |
| BACOVA_02649 750down Bam Rev | CCGGGATCCGTTGGCAGATACGTTGCGTAGGA                |                                                                                                                               |
| BACOVA_02649 middle for      | GACTGCTGCAAAATCTAAAGCGGC                        |                                                                                                                               |
| BACOVA_02649 middle rev      | GCCGCTTTAGATTTTGCAGCAGTC                        |                                                                                                                               |

<sup>1</sup> Site-directed mutagenesis via a two-primer reaction

<sup>2</sup> Site-directed mutagenesis via a one-primer reaction
